# Supplementary material
Source: Research Square preprint supplement (doi:10.21203/rs.3.rs-9365361/v1)

CD137L adjuvanted vaccine increases antigen-specific T-cell responses but impacts antigen-specific humoral responses

Kanin Salao1,2,3#, Ming Xuan Lim4#, Daryl Zhang Wei Lee2,3, Jazz Linn Ng2,3, Jia Le Lin1,2,3, Wanzhen Lu4, Estelle Goh4, Emily Nickles1,2, Herbert Schwarz1,2†*, Sylvie Alonso2,3,5†*, Guillaume Carissimo4,6,7†*

Supplementary material and methods

**Supplementary Material**

Table S1. T-cell panel antibodies for flow cytometry (M2e and NP)

| Target | Fluorochrome | Dilution | Catalog number | Brand |
| --- | --- | --- | --- | --- |
| Cell surface staining | | | | |
| CD3 | BUV421 | 1:100 | 704014 | BD Biosciences |
| CD4 | APC | 1:100 | 561091 | BD Biosciences |
| CD8 | RY775 | 1:100 | 571368 | BD Biosciences |
| CD107a | PE | 1:100 | 558661 | BD Biosciences |
| Intracellular staining | | | | |
| IFNγ | FITC | 1:100 | 554411 | BD Biosciences |
| TNFα | RB613 | 1:100 | 571332 | BD Biosciences |
| IL-2 | RB705 | 1:100 | 570704 | BD Biosciences |

Table S2. T-cell panel antibodies for flow cytometry (RBD)

| Target | Fluorochrome | Dilution | Catalog number | Brand |
| --- | --- | --- | --- | --- |
| Extracellular T-cell staining | | | | |
| PD-1 | APC-R700 | 1:200 | 566876 | BD Biosciences |
| CD25 | SBUV665 | 1:50 | MCA1260SBUV665 | Bio-Rad |
| CD4 | BUV496 | 1:200 | 612952 | BD Biosciences |
| CD185 (CXCR5) | BV785 | 1:80 | 145523 | Biolegend |
| CD8a | APC-Fire 750 | 1:200 | 100766 | Biolegend |
| CD69 | BV711 | 1:50 | 104537 | Biolegend |
| CD3 | PECy7 | 1:200 | 560591 | BD Biosciences |
| CD103 | APC | 1:80 | 562772 | BD Biosciences |
| CD45 | BUV805 | 1:200 | 368-0451-82 | Thermo Fisher Scientific |
| CD19 | Biotinylated | 1:200 | 115504 | Biolegend |
| CD11b | Biotinylated | 1:400 | 101204 | Biolegend |
| CD161 (NK1.1) | Biotinylated | 1:400 | 108704 | Biolegend |
| Intracellular T-cell cytokine staining | | | | |
| IL-10 | BV605 | 1:20 | 505031 | Biolegend |
| IL-17A | BUV615 | 1:80 | 366-7177-82 | Thermo Fisher Scientific |
| IL-5 | BV421 | 1:20 | 504311 | Biolegend |
| IFN-g | PE-CF594 | 1:80 | 562303 | BD Biosciences |
| IL-4 | AF488 | 1:50 | 504109 | Biolegend |
| Granzyme B | PerCP-eFluor 710 | 1:100 | 46-8898-82 | Thermo Fisher Scientific |

Table S3. B cell panel antibodies for flow cytometry (M2e)

| Target | Fluorochrome | Dilution | Catalog number | Brand |
| --- | --- | --- | --- | --- |
| Cell surface staining | | | | |
| B220 | BUV395 | 1:200 | 563793 | BD Biosciences |
| IgD | BV711 | 1:200 | 564275 | BD Biosciences |
| GL-7 | Alexa Fluor 647 | 1:200 | 561529 | BD Biosciences |
| CD95 | BV605 | 1:200 | 152612 | Biolegend |
| Decoy (Sav) | BB515 | 1 μg/mL | 564453 | BD Biosciences |

Table S4. B cell panel antibodies for flow cytometry (RBD)

| Target | Fluorochrome | Dilution | Catalog number | Brand |
| --- | --- | --- | --- | --- |
| B cell staining | | | | |
| IgD[b] | BUV661 | 1:25 | 750656 | BD Biosciences |
| CD19 | BUV805 | 1:100 | 368-0193-82 | Thermo Fisher Scientific |
| CD27 | BV421 | 1:100 | 124223 | Biolegend |
| CD184 (CXCR4) | BV711 | 1:200 | 146517 | Biolegend |
| CD95 | FITC plus | 1:200 | FITC-9813 | Proteintech |
| CD138 | PE-Dazzle594 | 1:100 | 142528 | Biolegend |
| GL7 | PECy7 | 1:200 | 144620 | Biolegend |
| CD45R (B220) | AlexaFluor700 | 1:200 | 103232 | Biolegend |

**Figure S1. Gating strategies for flow cytometry.**

Gating strategy for M2e specific GC B cells for mRNA format

*
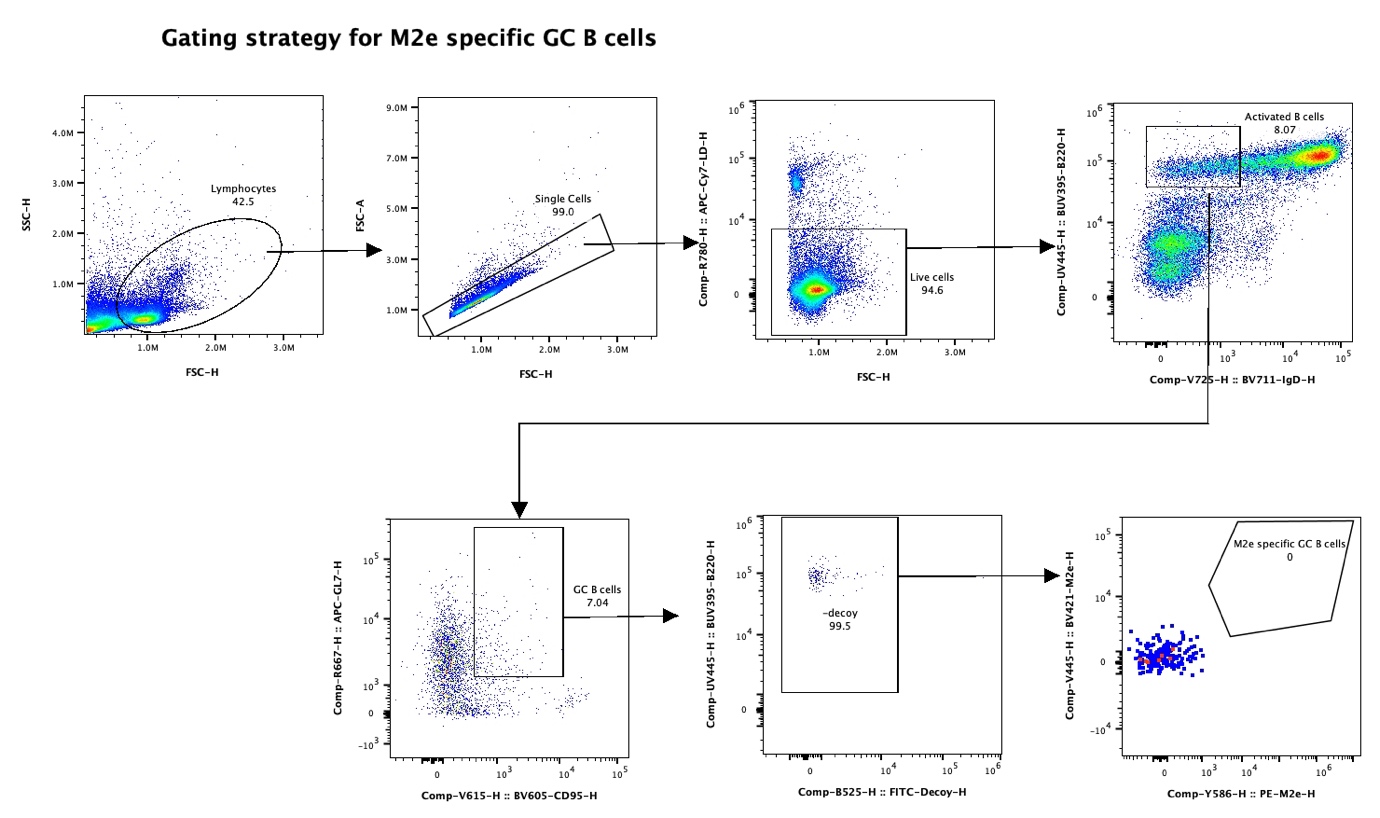
*

Gating strategy for effector T-cells for mRNA format

*
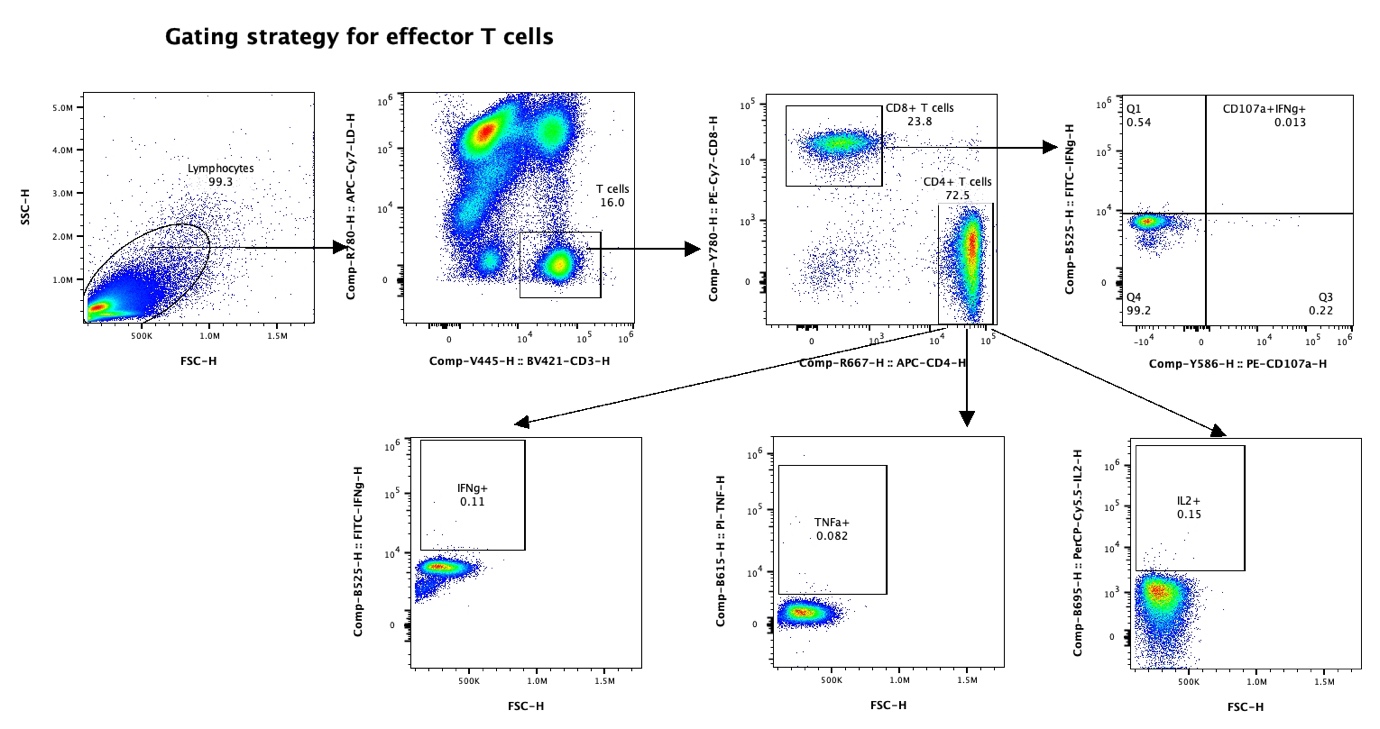
*

B cell gating strategy for recombinant protein format


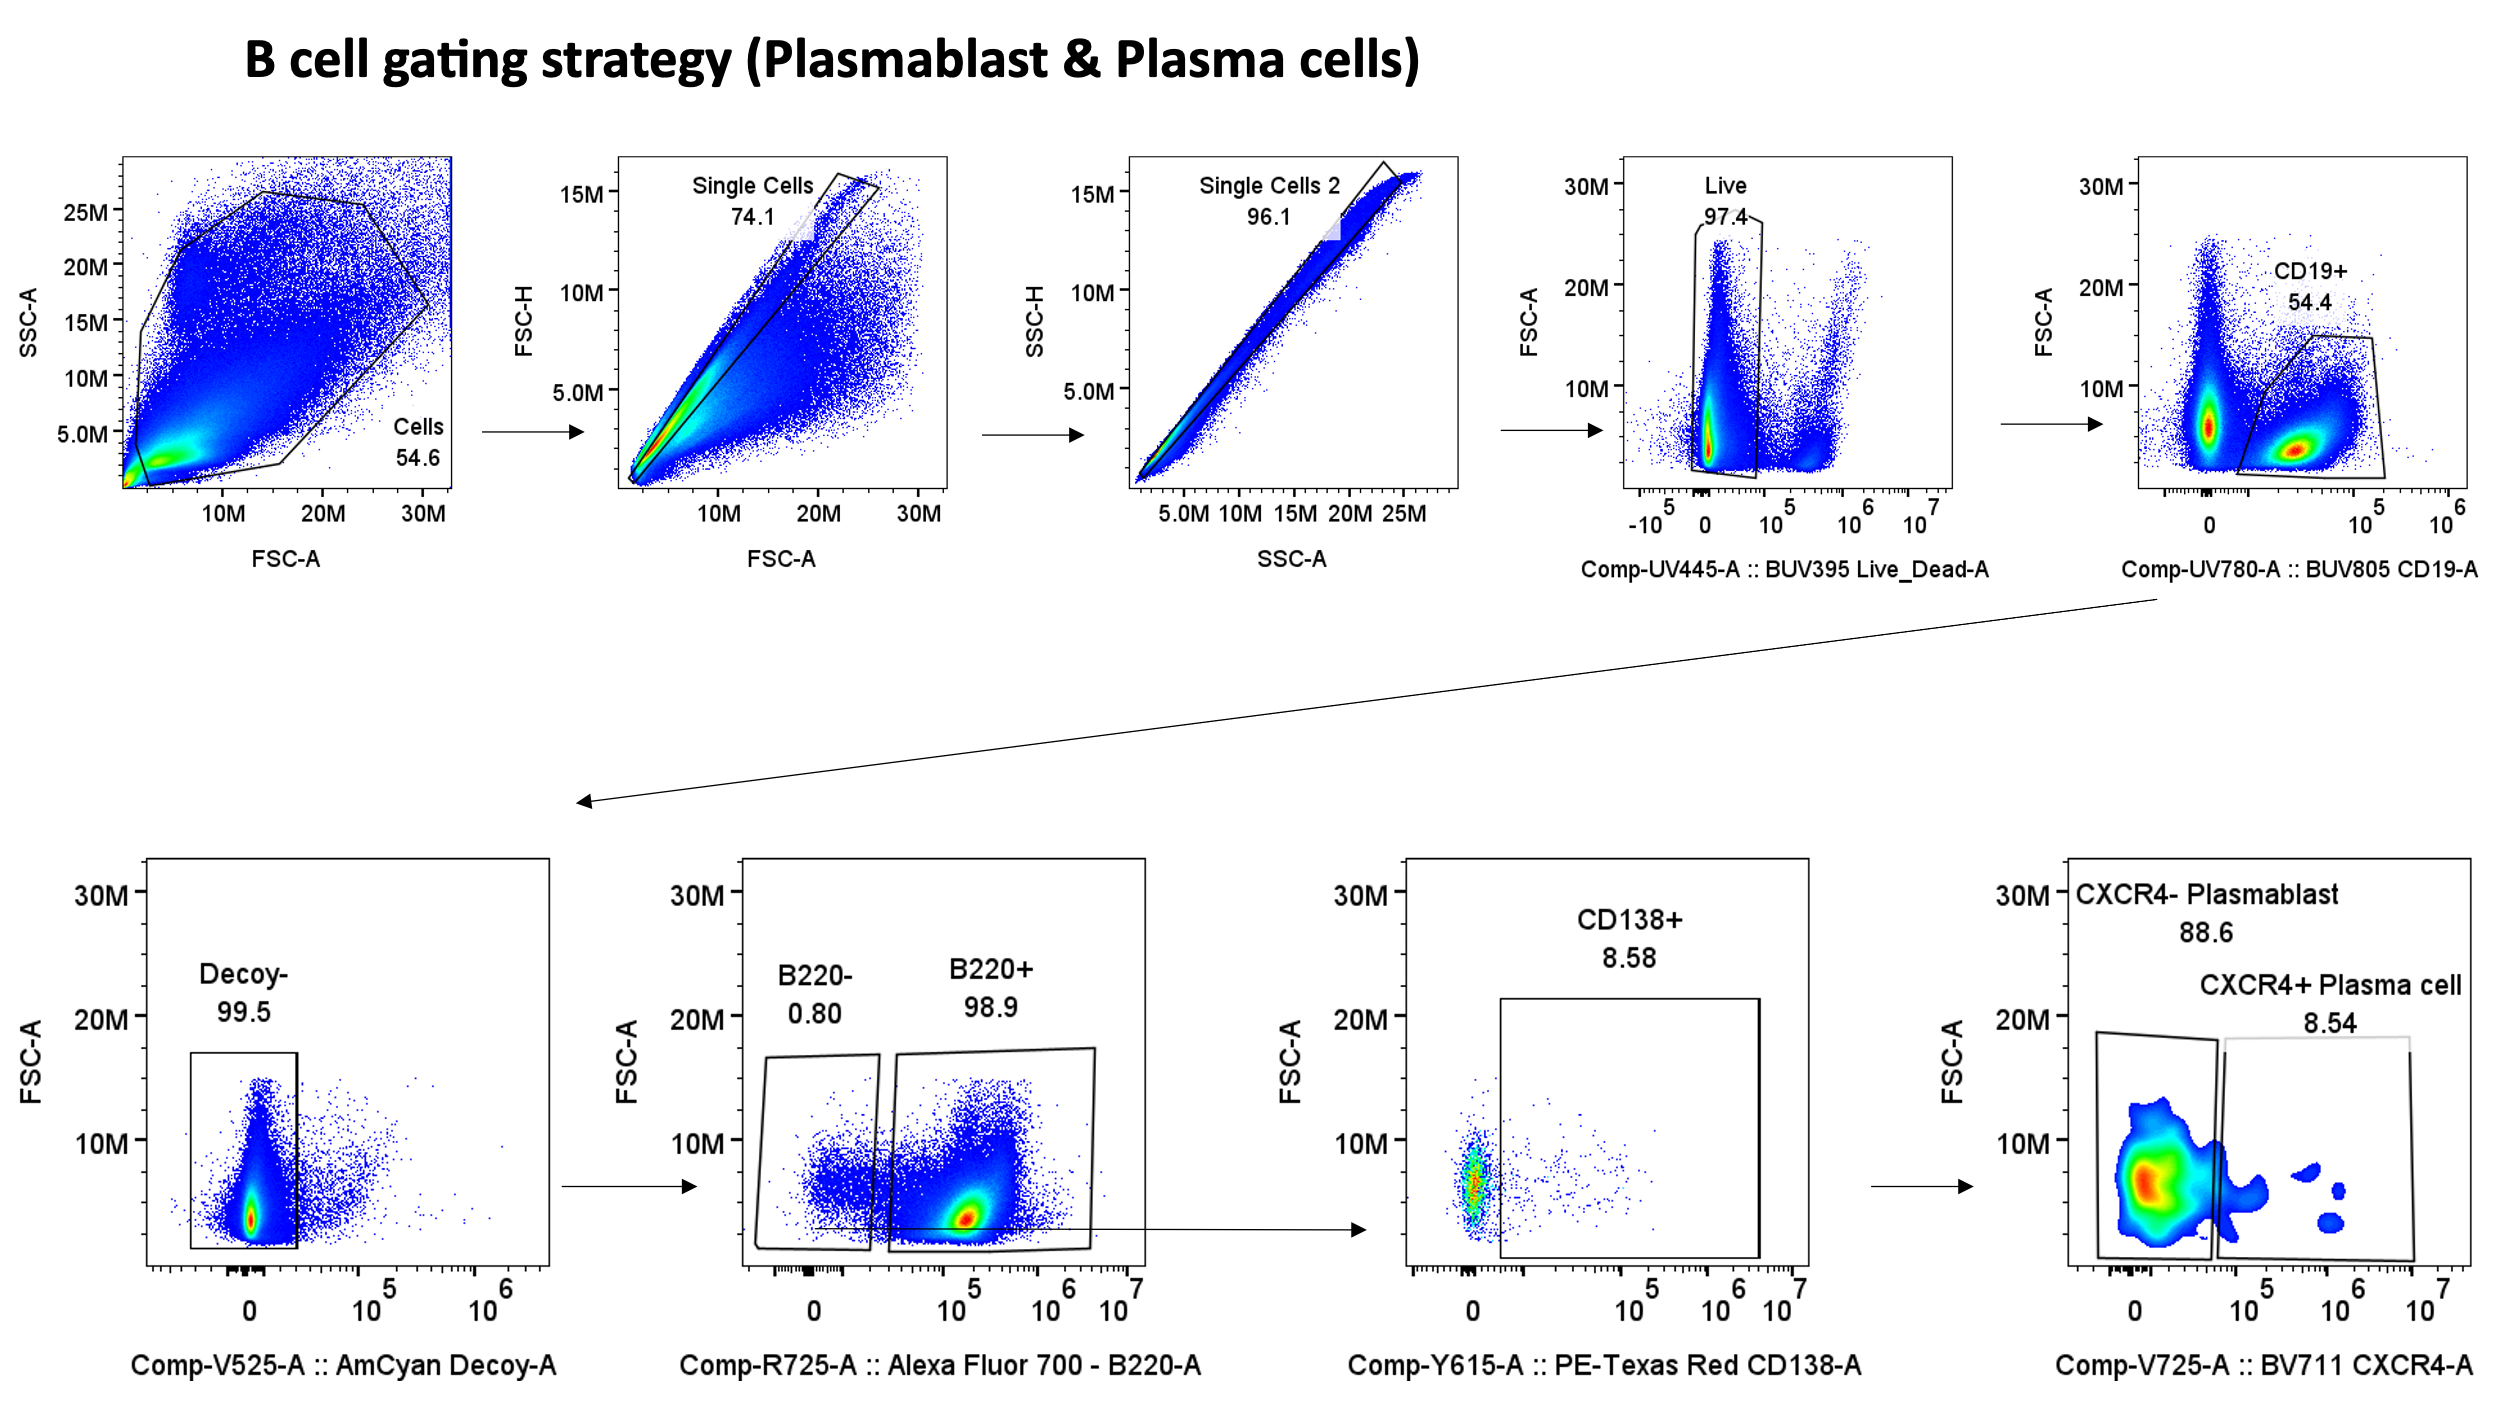


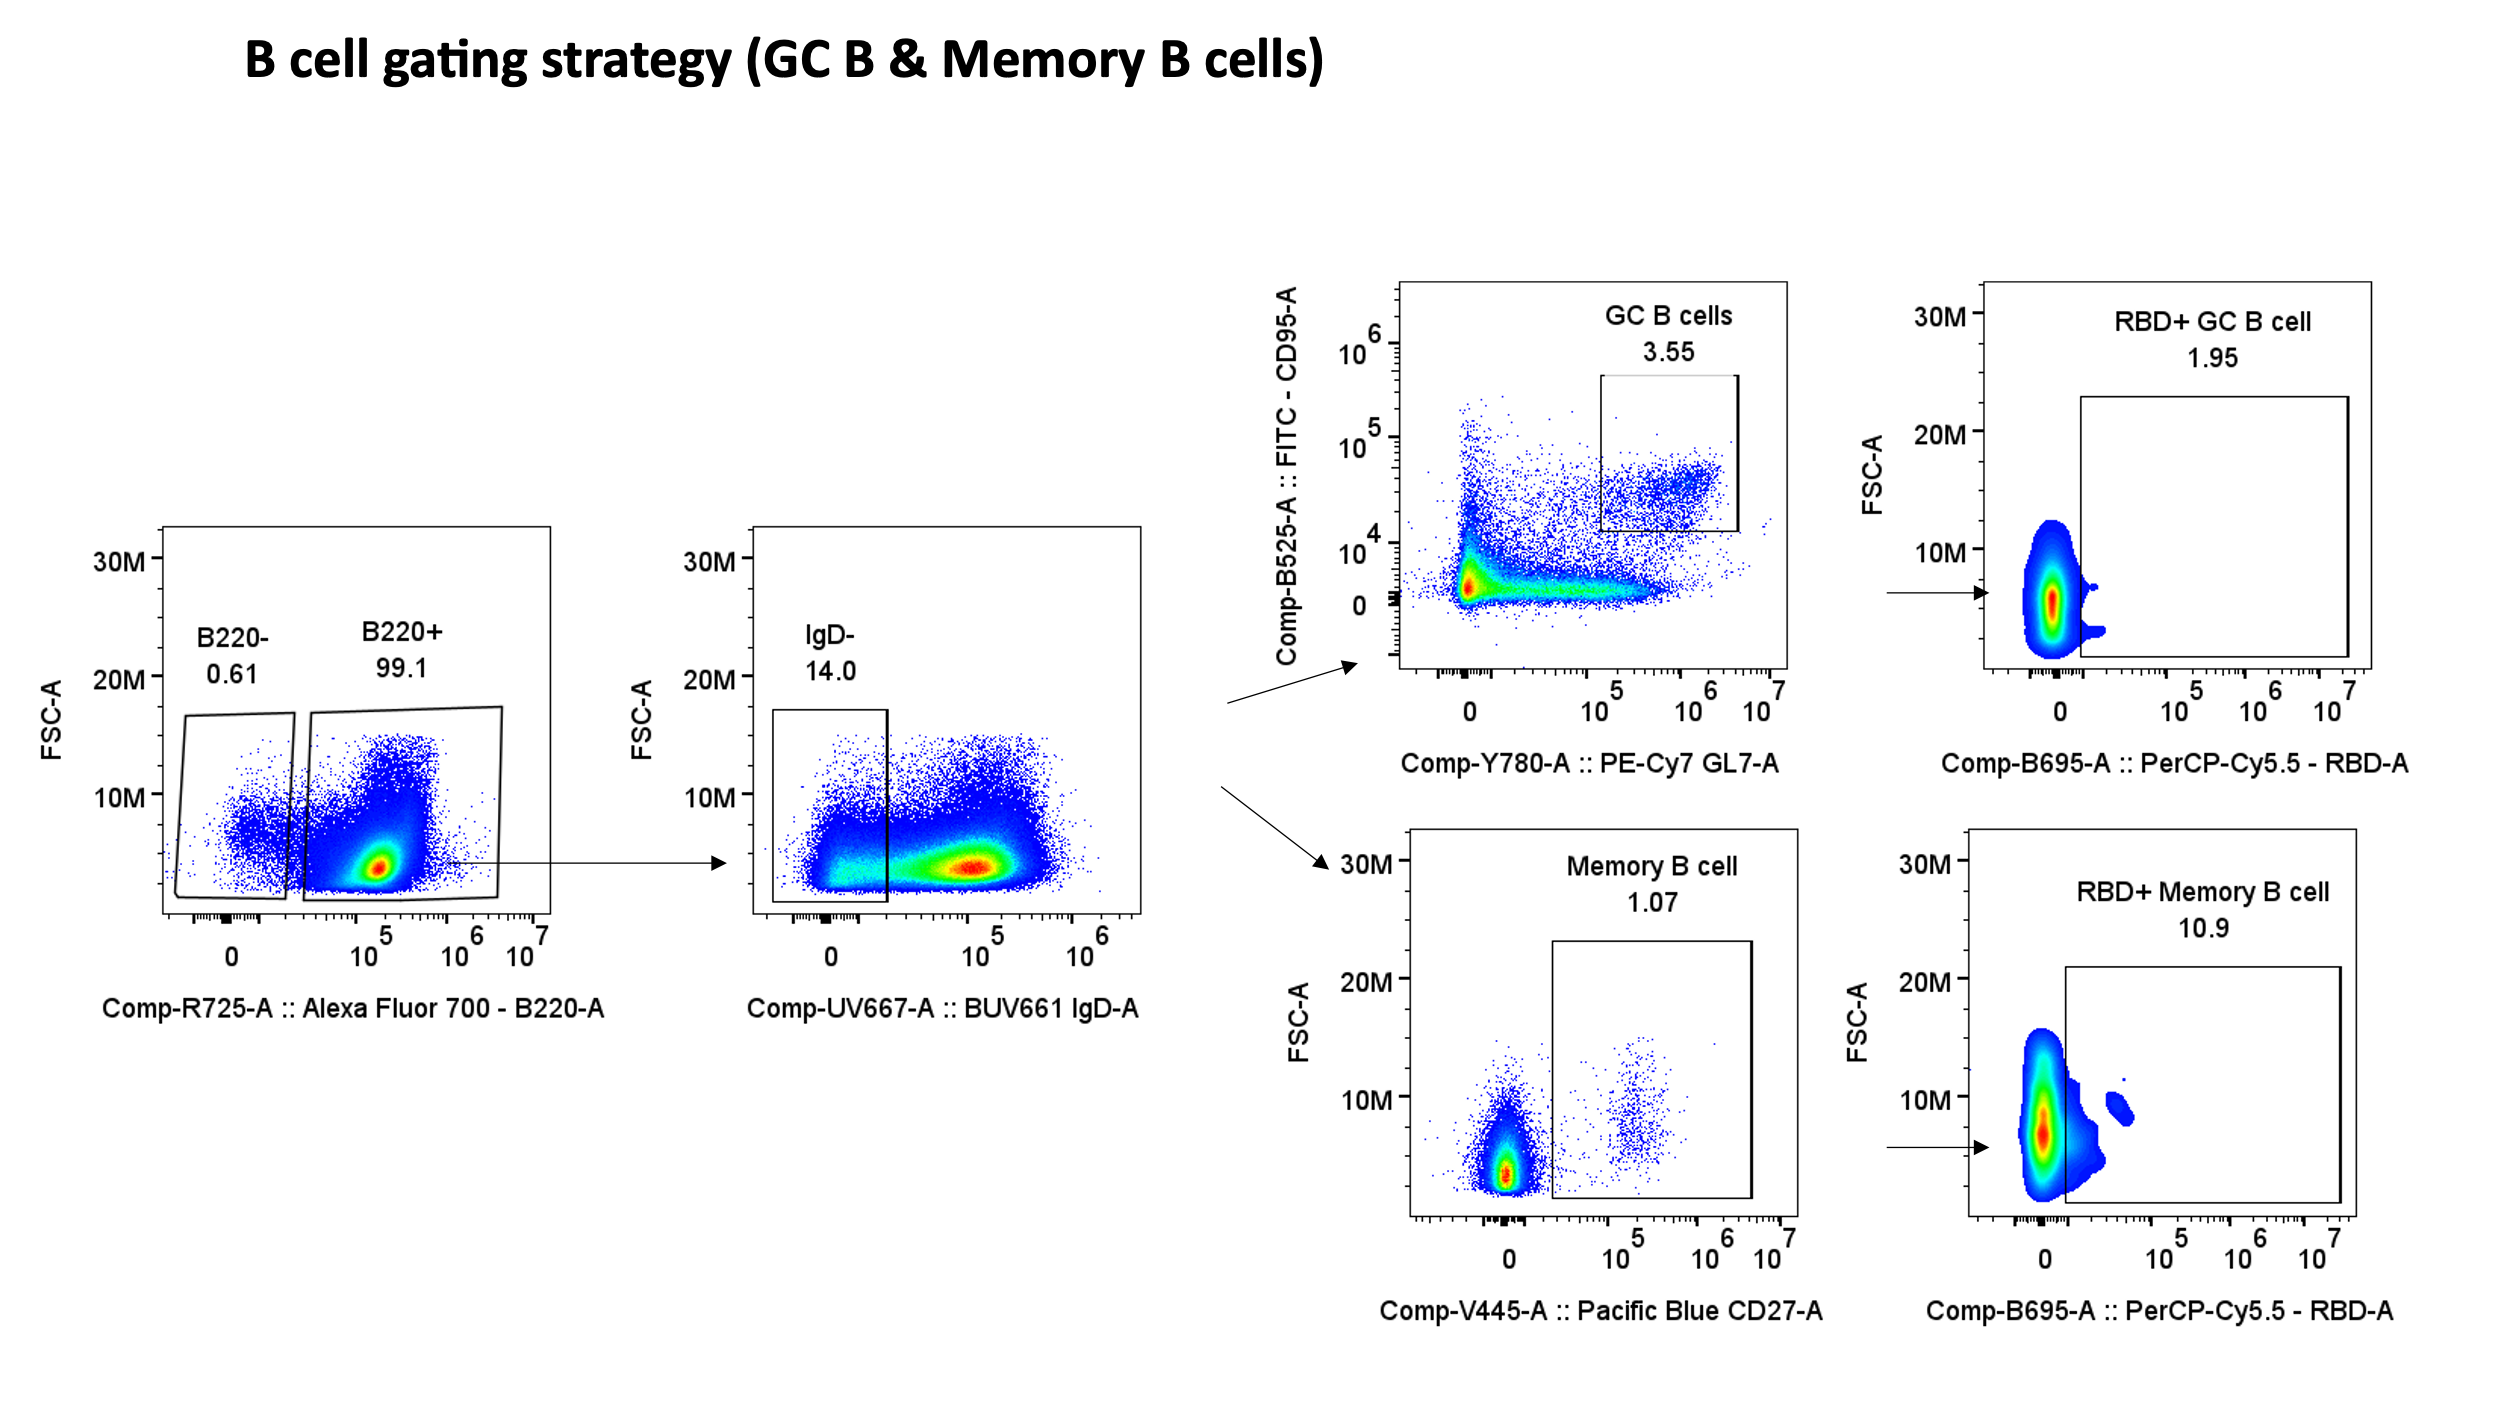


T-cell gating strategy for recombinant protein format


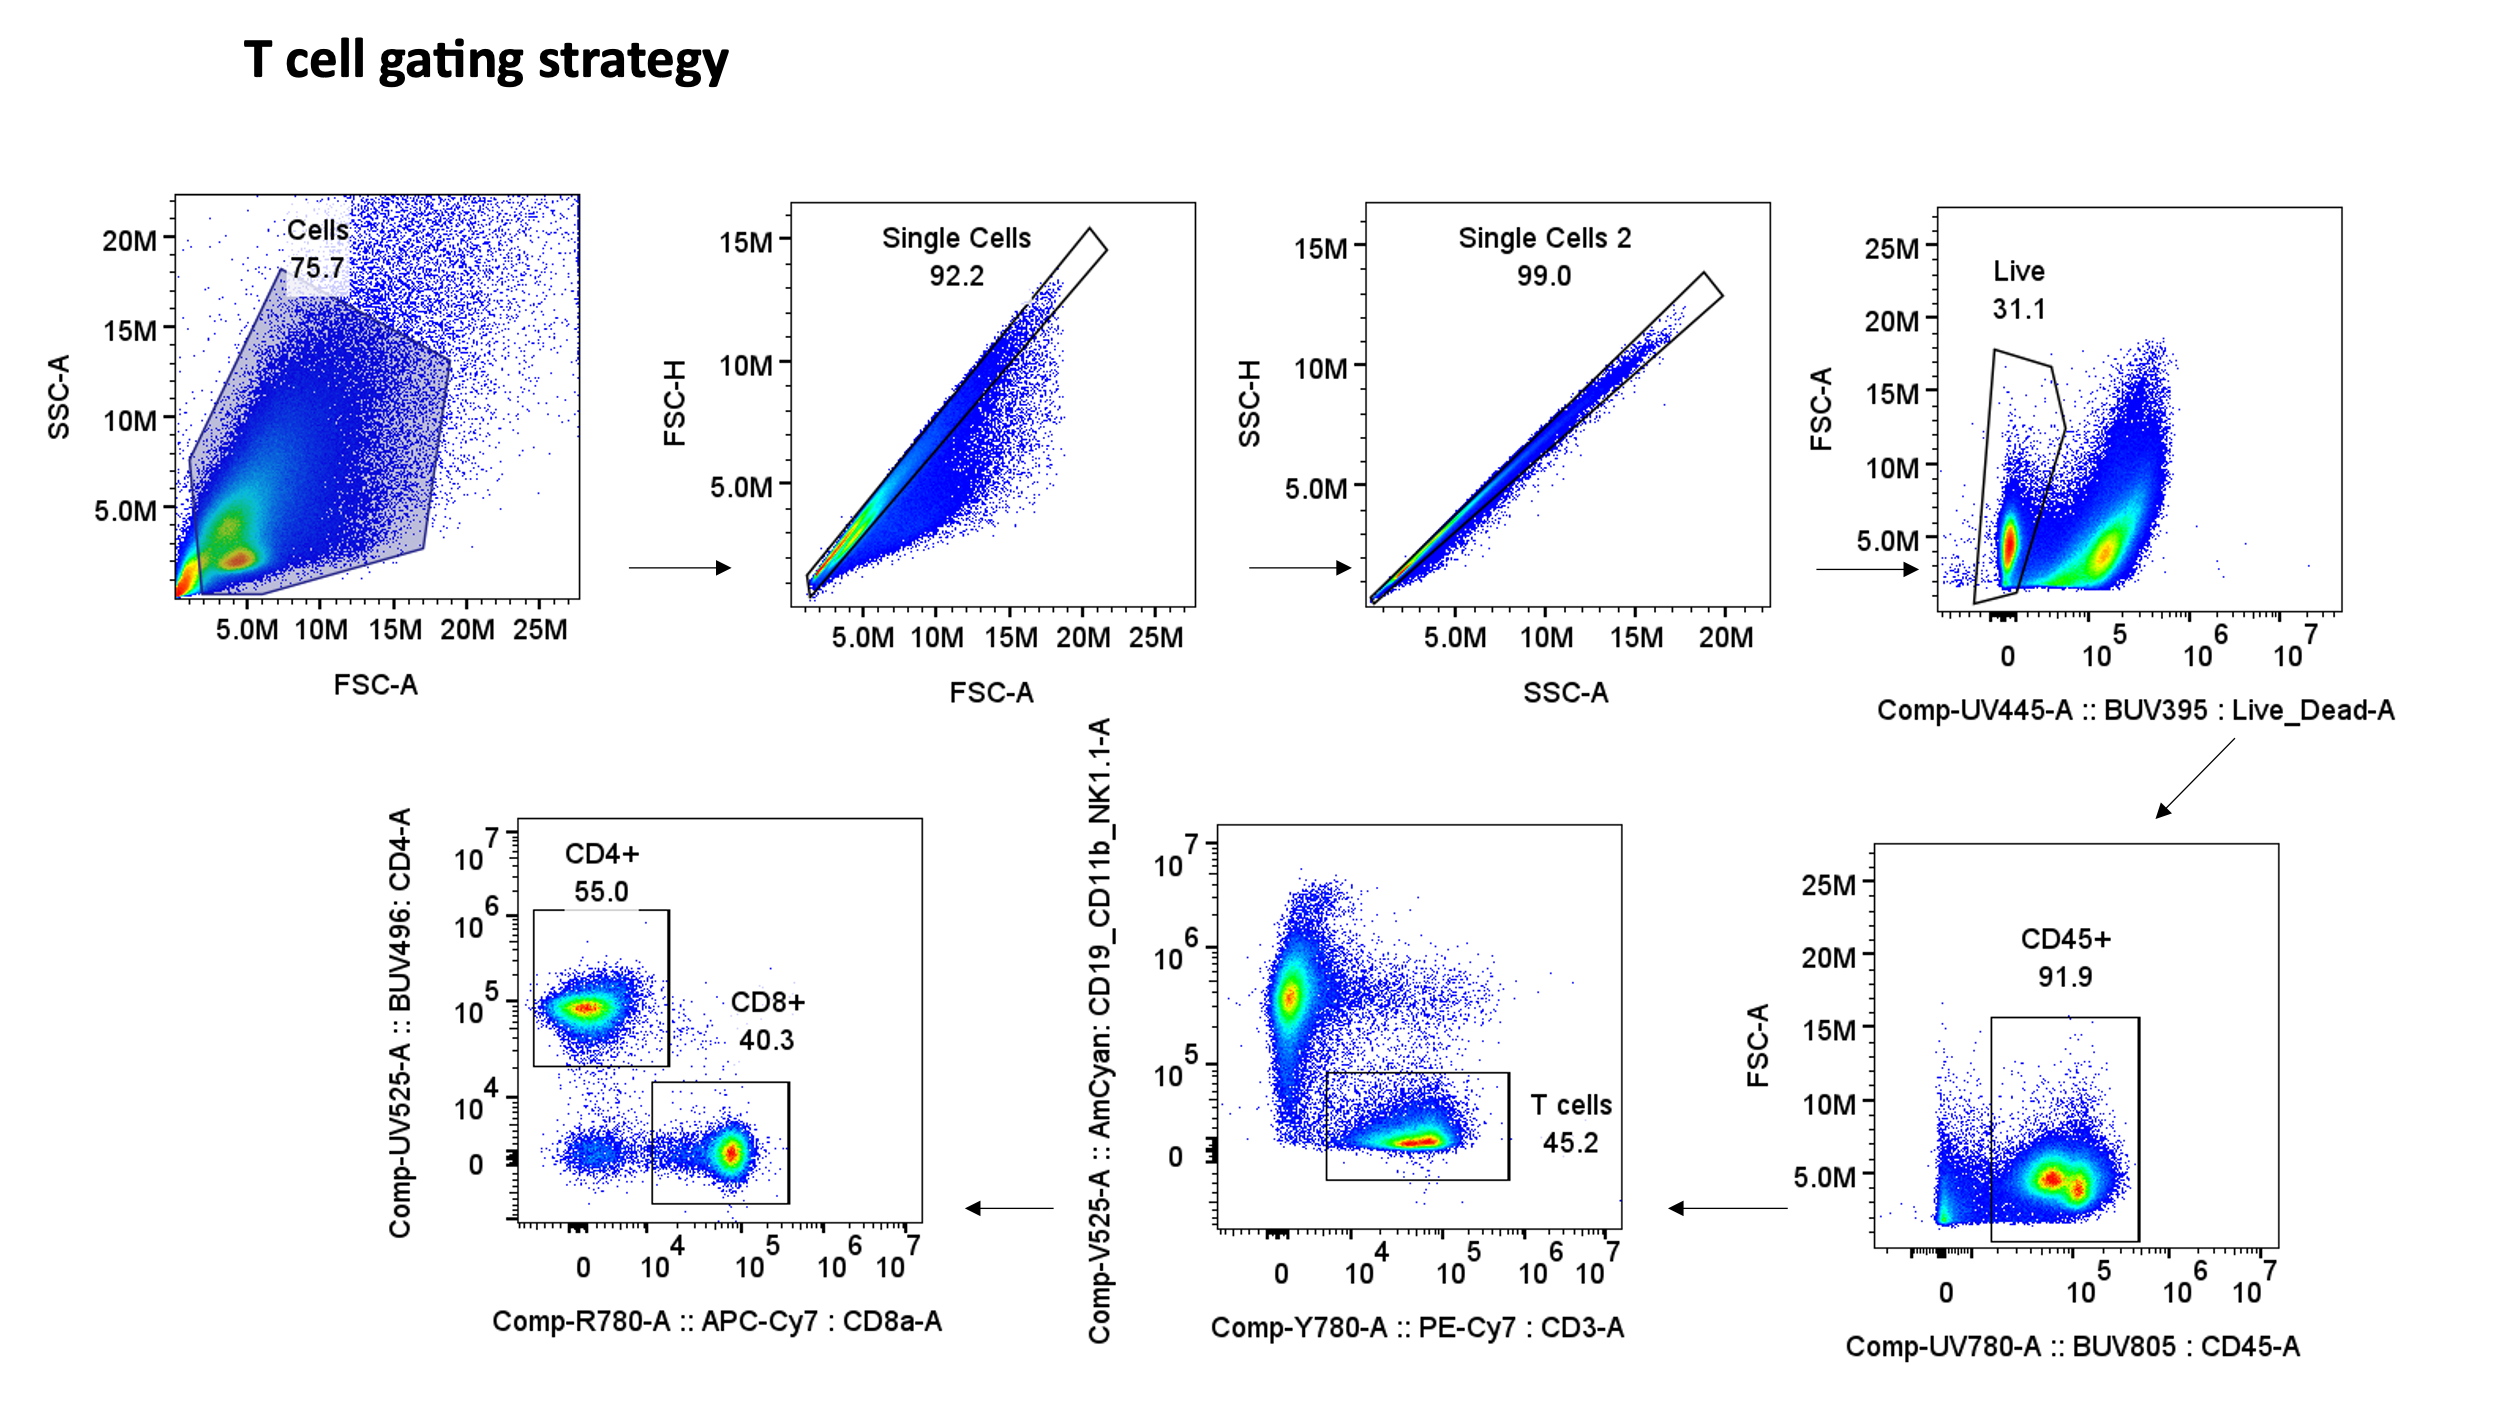


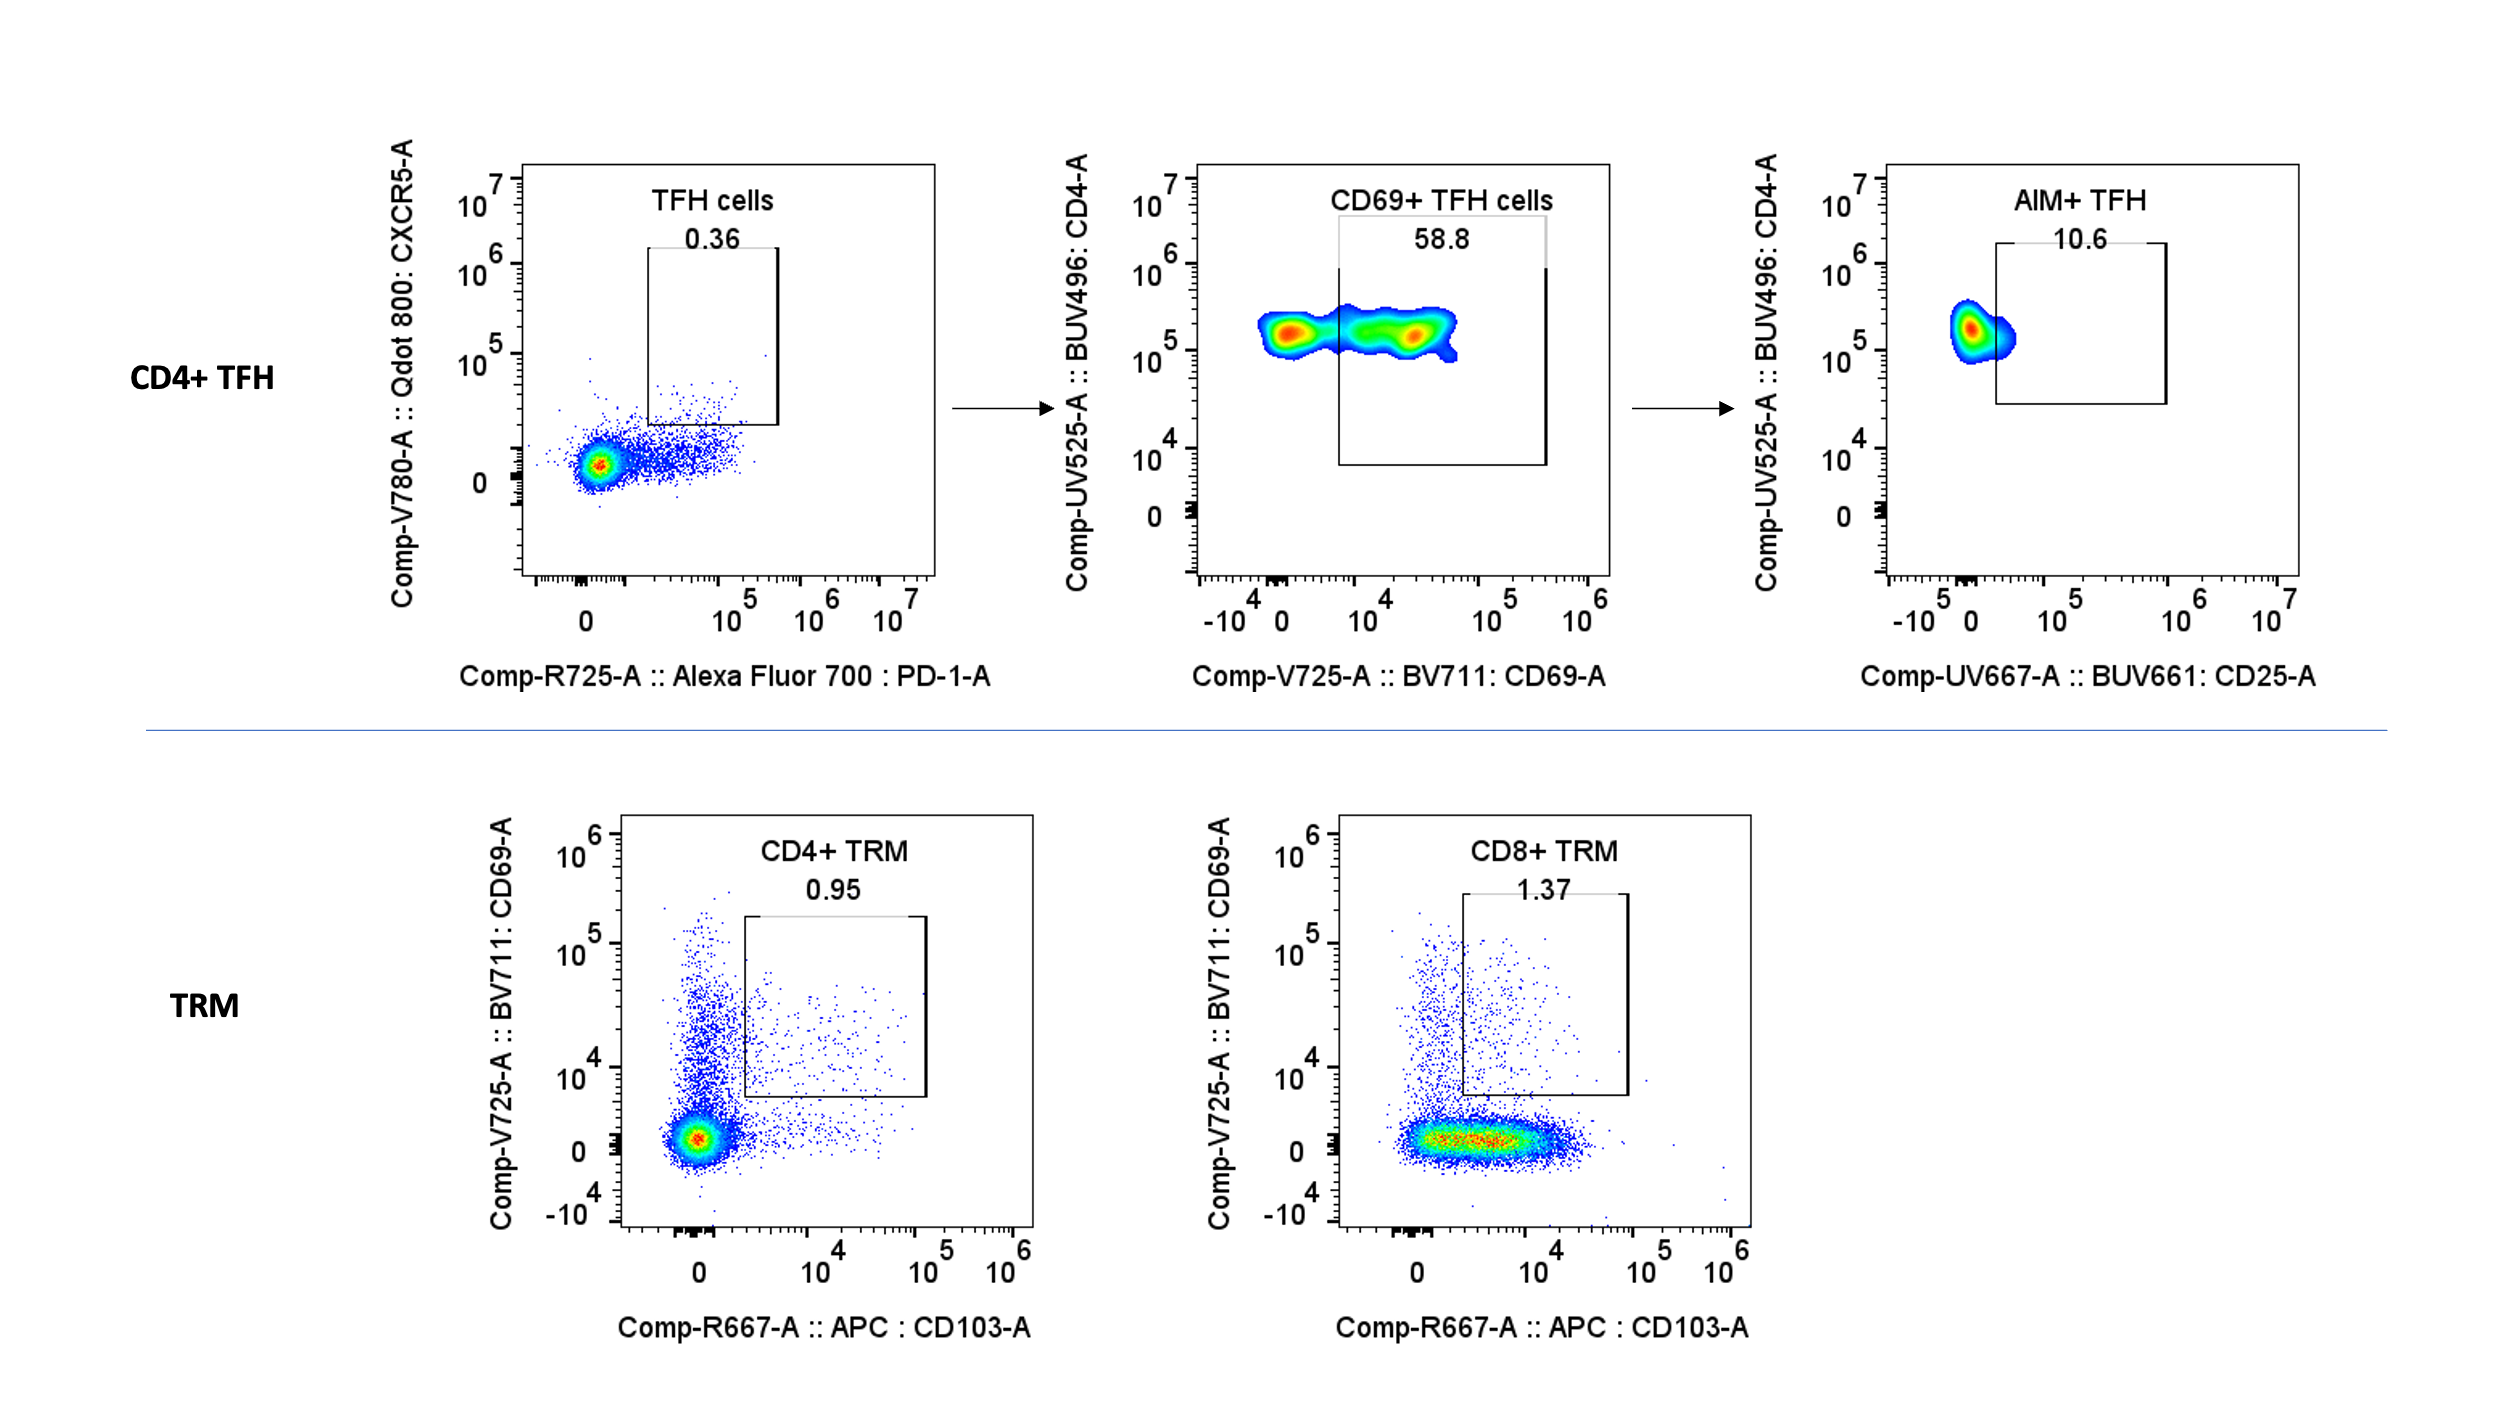

Supplement: Supplementary file 1 [file 0a029868918275e2cb80356e.docx]
