# Supplementary material
Source: Research Square preprint supplement (doi:10.21203/rs.3.rs-9365361/v1)
Supplement: Supplementary file 2 [file a1162649ab8950bd91ecd19b.xlsx]

## Sheet: 1B
TNF⍺	M2-NP	CD137L-M2-NP		IFNƔ	M2-NP	CD137L-M2-NP		IL2	M2-NP	CD137L-M2-NP
	11.3	10.8			2.38	5.9			7.84	6.33
	5.62	12.1			1.31	5.47			4.05	6.63
	5.09	11.5			1.86	6.38			3.58	6.75
	3.31	7.69			1.51	2.16			2.74	5.77
	1.81	6.64			0.91	2.37			1.47	4.62
	2.31	11.2			0.88	4.2			4.05	7.2
	2.25	7.8			1.21	4.7			2.3	6.6
	3.23	6.8			1.32	5.4			4.2	5.6
	2.56	10.2			2.1	4.8			3.4	8.6
	3.1	11.2			1.56	5.5			3	4.3

## Sheet: 1C
CD107a+IFNƔ+	M2-NP	CD137L-M2-NP		CD107a+TNF⍺+	M2-NP	CD137L-M2-NP
	7.95	18.9			2.76	12.4
	11.1	12			5.65	13.3
	11.2	18.7			3.34	11.6
	13.2	13.9			3.63	9.46
	8.32	13.4			3.03	7.63
	8.22	11.1			5.74	4.16
	7.58	11.2			4.97	2.88
	8.2	13.2			4.23	3.88
	8.94	10.6			3.25	4.6
					2.67	2.75

## Sheet: 1D
IFNƔ+	M2-NP	CD137L-M2-NP		TNF⍺+	M2-NP	CD137L-M2-NP
	0.98	0.57			0.77	0.5
	0.46	0.4			1.01	1.09
	0.51	0.46			1.25	0.93
	0.92	0.88			1.72	1.23
	1.09	0.95			1.24	1

## Sheet: 1E
CD107a+IFNƔ+	M2-NP	CD137L-M2-NP		CD107a+TNF⍺+	M2-NP	CD137L-M2-NP
	3.34	6.01			2.2	3.46
	4.15	6.4			2.14	3.17
	4.71	5.19			2.52	3.79
	4.64	6			2.86	3.96
	3.28	6.38			2.24	5.21

## Sheet: 2A
Pre-boost	M2-NP	CD137L-M2-NP		Post-boost	M2-NP	CD137L-M2-NP
	1600	50			409600	200
	800	50			102400	200
	1600	50			409600	200
	200	50			409600	200
	200	50			25600	200
	200	50			102400	200
	12800	50			204800	200
	200	50			12800	200
	1600	50			819200	200
	12800	50			409600	200

## Sheet: 2B
GC B cells	M2-NP	CD137L-M2-NP
	3.75	1.56
	2.78	0
	1.3	0.53
	3.81	1.32
	4.69	0.71
	0.75	0.51
	0.74	0.16
	0.6	0.3
	0.58	0.71
	0.71	0

## Sheet: 2C
Pre-boost	M2-NP	CD137L-M2-NP		Post-boost	M2-NP	CD137L-M2-NP
	3200	1600			204800	204800
	3200	3200			102400	204800
	1600	1600			102400	204800
	3200	1600			204800	102400
	3200	3200			102400	102400
	3200	3200			102400	102400
	3200	3200			204800	204800
	3200	1600			204800	204800
	1600	3200			409600	102400
	3200	3200			409600	102400

## Sheet: 2D
	M2-NP					CD137L-M2-NP
Post Prime 2w	3200	800	3200	3200	3200	800	800	800	800	800
Post Boost 1w	102400	204800	102400	204800	25600	800	800	800	800	800
Post Boost 2w	102400	204800	204800	102400	25600	800	800	800	800	800
Post Boost 1m	102400	102400	204800	204800	102400	800	800	800	800	800
Post Boost 3m	51200	12800	51200	51200	102400	800	800	800	800	800

## Sheet: 2E
	M2-NP					CD137L-M2-NP
Post Prime 2w	6400	6400	6400	6400	6400	3200	6400	6400	3200	1600
Post Boost 1w	204800	204800	204800	204800	102400	102400	51200	102400	102400	51200
Post Boost 2w	204800	204800	409600	409600	102400	102400	102400	204800	102400	102400
Post Boost 1m	204800	409600	102400	409600	102400	204800	204800	102400	204800	204800
Post Boost 3m	409600	204800	409600	409600	204800	102400	204800	102400	102400	102400

## Sheet: 3A
Th1 IFNy+
RBD															RBD + CD137L
13716	12165	15257	15148	18947	3716	4767	4716	16646	12785	11739	19183	11507	11017	10457	7136	22236	3991	10037	6140	15246	28583	14479	8625	13096	23569	19046	14142	29785
Th2 IL4+
RBD															RBD + CD137L
509197	417308	482643	481310	466905	284197	181820	333483	442692	447132	340059	466168	346365	384850	418044	343284	573481	213921	390420	346795	441521	505543	524501	361883	471970	576912	665334	620072	589958
Th2 IL5+
RBD															RBD + CD137L
5115	4025	4344	4666	4645	3213	1476	2666	5133	4391	3055	3237	2494	1781	2480	2932	5659	1727	3724	2634	5653	4848	6410	2909	3978	5958	5133	5859	5511
IL10+
RBD															RBD + CD137L
213108	174651	201244	201437	195408	111100	75062	138283	189045	199200	122546	216352	114311	152415	153707	143037	240012	88693	162711	143370	185724	223436	217927	152904	184334	284164	279966	263659	358434
Th17 IL17+
RBD															RBD + CD137L
16835	7739	6525	9746	13330	4997	4382	5518	7380	9043	4204	7870	8229	7796	8222	6050	13151	2908	8352	6921	8661	10079	9571	8148	7943	10571	4193	10424	9778
TFH PD1+ CXCR5+
RBD															RBD + CD137L
1460	1161	2868	3839	1906	545	719	772	738	1613	1499	1543	2470	2007	1172	1312	927	970	1217	2414	1532	1920	1811	1351	1421	1277	1495	780	1259
TFH PD1+ CXCR5+ CD69+
RBD															RBD + CD137L
0	704	1723	2374	1783	318	330	467	495	809	1600	937	750	825	480	705	573	579	440	1254	789	1176	935	619	817	508	1815	632	658
TFH AIM+
RBD															RBD + CD137L
events acquired are too low to detect AIM+ accurately for these samples					25	58	34	0	12	132	37	28	61	18	events acquired are too low to detect AIM+ accurately for these samples					83	66	49	32	21	29	105	0	49
TRM CD4+ CD69+ CD103+
RBD															RBD + CD137L
4135	2921	3787	3943	3438	1781	1618	3347	3236	3790	4310	4790	3552	3908	3372	2305	4761	1641	3270	4298	3672	4965	3553	3852	4578	3673	2149	4114	3063

[truncated: 4 more sheets: 3B, 3C RBD Specific IgG, 3C cPass, 3D  ]
